# Supplementary material
Source: MDPI journal article supplement (https://www.mdpi.com/2077-0472/12/2/266)
Supplement: s1 [file s1]

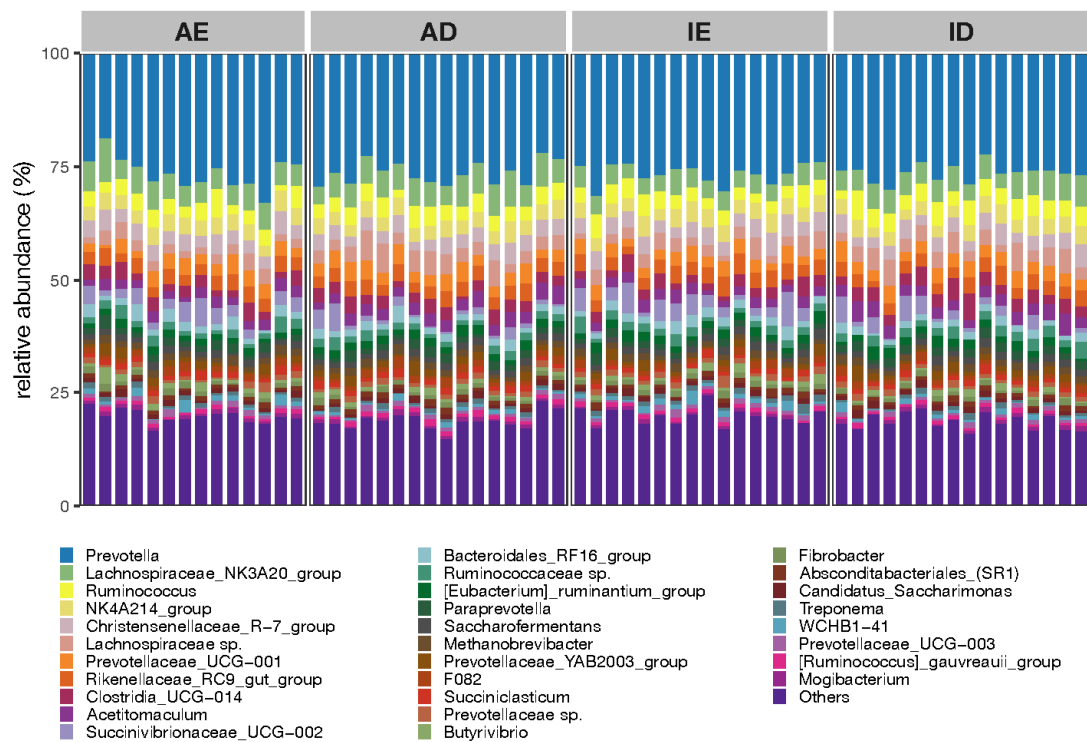

**Figure S1.** Relative abundance of bacterial taxa at genus level in treatment groups AE, AD, IE and ID.

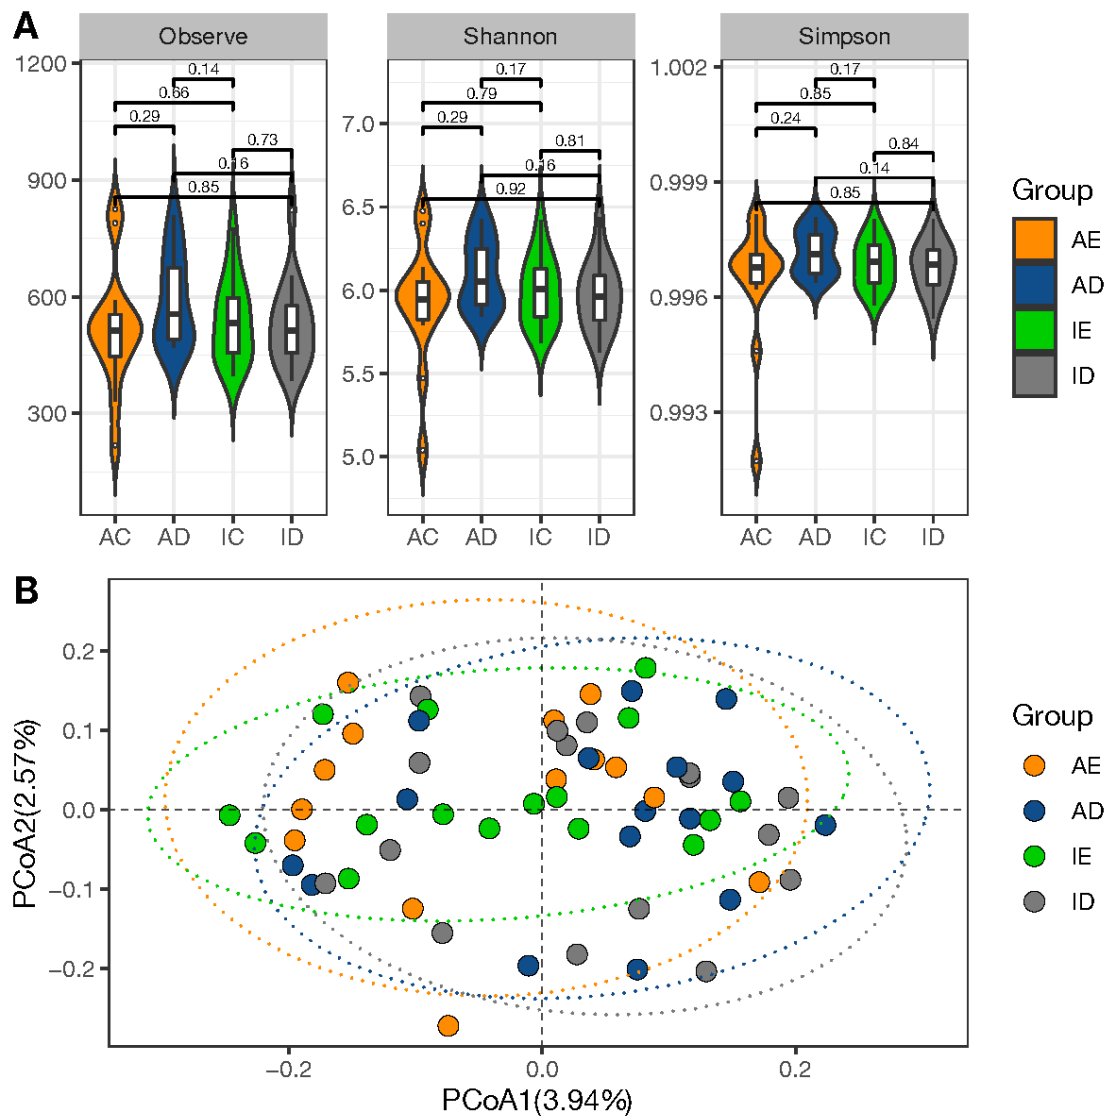

**Figure S2.** Bacterial alpha (**A**) and beta (**B**) diversity estimates based on treatment groups AE, AD, IE and ID.

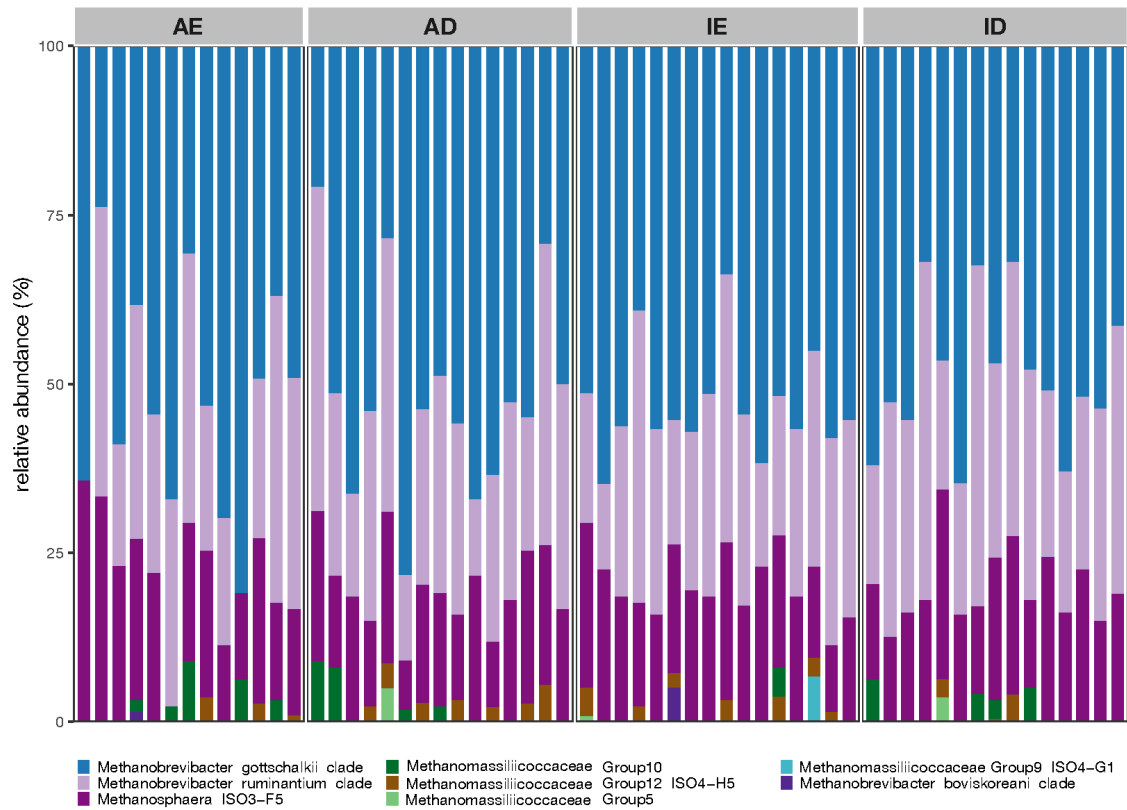

**Figure S3.** Relative abundance of archaea at species level in treatment groups AE, AD, IE and ID.

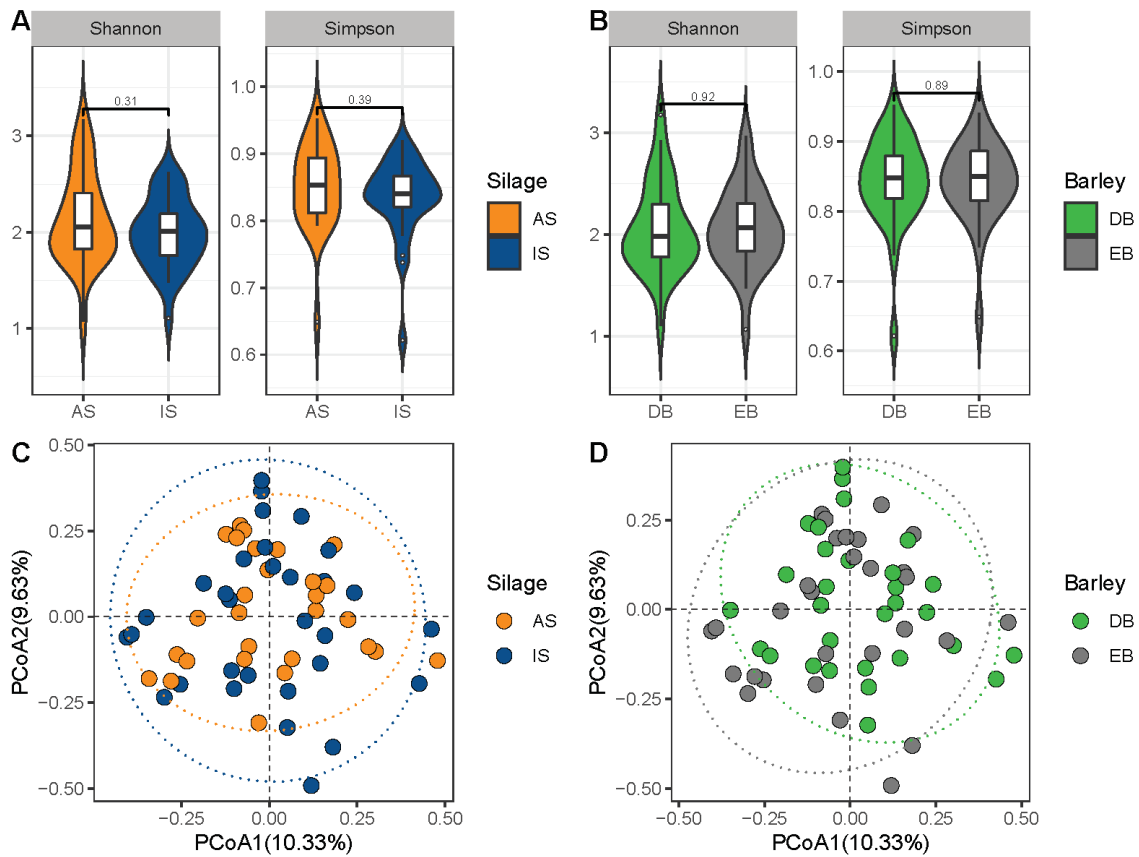

**Figure S4.** Archaeal alpha and beta diversity estimates for groups based on silage (A and C) and barley (B and D) preparation methods.
